# Supplementary material for: Immunologically programming the tumor microenvironment induces the pattern recognition receptor NLRC4-dependent antitumor immunity
Source: PubMed Central journal article supplement — J Immunother Cancer. 2021 Jan 18;9(1):e001595. doi: 10.1136/jitc-2020-001595 (PMC7817794; doi:10.1136/jitc-2020-001595), 2021-01-18
Supplement: jitc-2020-001595supp001.pdf [file jitc-2020-001595supp001.pdf]

## Supplementary Figure S1

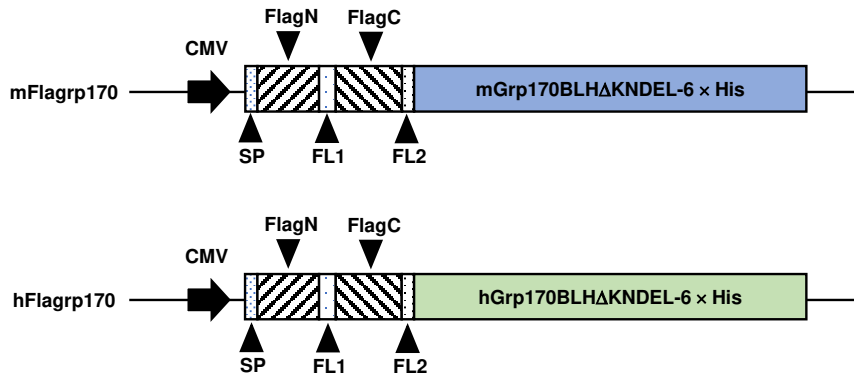

**Supplementary Figure S1. Schematic illustration of constructed human and mouse Flagrp170.** The NF- $\kappa$ B-activating sequence derived from flagellin was fused to the ATP-binding domain deletion mutant of mouse Grp170 (BLH) or human Grp170 (BLH). SP, Grp170 signal peptide (33 aa); FlagN, N-terminus of flagellin (1-172 aa); FL, flexible linker; FlagC, C-terminus flagellin (402-495 aa); mGrp170BLH $\Delta$ KNDEL-6  $\times$  His, the BLH domain of mouse Grp170, from which the KNDEL sequence (431-994 aa) was removed and replaced with a His-tag. hGrp170BLH $\Delta$ KNDEL-6  $\times$  His, the BLH domain of human Grp170, from which the KNDEL sequence (431-994 aa) was removed and replaced with a His-tag.
