# Supplementary material for: Immunologically programming the tumor microenvironment induces the pattern recognition receptor NLRC4-dependent antitumor immunity
Source: PubMed Central journal article supplement — J Immunother Cancer. 2021 Jan 18;9(1):e001595. doi: 10.1136/jitc-2020-001595 (PMC7817794; doi:10.1136/jitc-2020-001595), 2021-01-18
Supplement: jitc-2020-001595supp004.pdf [file jitc-2020-001595supp004.pdf]

## Supplementary Figure S4

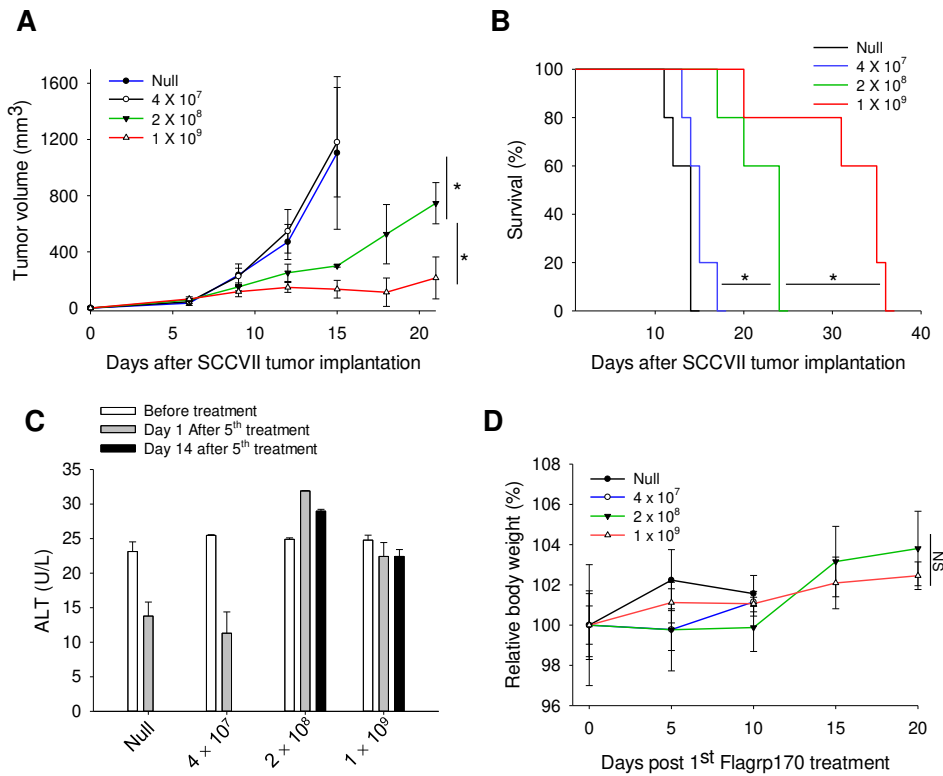

**Supplementary Figure S4. Therapeutic activity of differential doses of hFlagrp170-encoding adenovirus.** C3H/HeN mice (n=5) bearing SCCVII tumors (4~5 mm in diameter) were treated *i.t.* with an empty adenovirus (i.e., null) or an adenovirus encoding Flagrp170 at the indicated viral doses (p.f.u.) for a total of five treatments. Tumor growth (**A**) and animal survival (**B**) were followed. ALT levels in the serum (**C**) and body weight (**D**) of treated mice were examined for potential adverse effects. Data shown are representative of three independent experiments. \*,  $p < 0.05$ , NS, not significant, using two-way repeated measures ANOVA test (A), Log-rank test (B) and student t-test (D).
