# Supplementary material for: Immunologically programming the tumor microenvironment induces the pattern recognition receptor NLRC4-dependent antitumor immunity
Source: PubMed Central journal article supplement — J Immunother Cancer. 2021 Jan 18;9(1):e001595. doi: 10.1136/jitc-2020-001595 (PMC7817794; doi:10.1136/jitc-2020-001595), 2021-01-18
Supplement: jitc-2020-001595supp005.pdf [file jitc-2020-001595supp005.pdf]

## Supplementary Figure S5

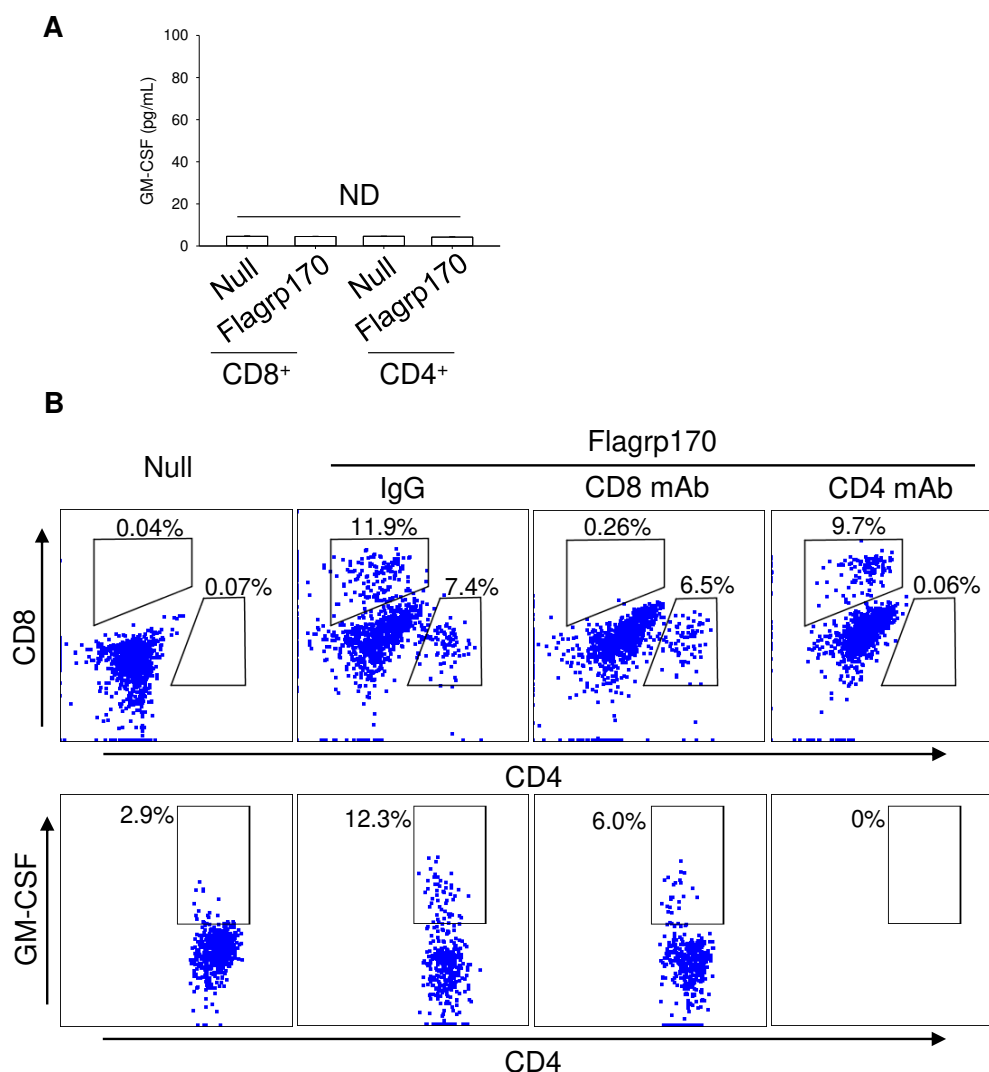

**Supplementary Figure S5. CD8<sup>+</sup> T cells are required for GM-CSF induction in CD4<sup>+</sup> T cells during Flagrp170 immunotherapy.** (A) Direct infection of T cells does not induce GM-CSF. CD8<sup>+</sup> or CD4<sup>+</sup> T cells were sorted from the spleens of C57BL/6 mice and infected with the Flagrp170-encoding adenovirus (MOI = 300). The level of GM-CSF in the culture media was determined by ELISA 48 h after infection. (B) B16 tumor-bearing C57BL/6 mice (n=3) received *in situ* Flagrp170 therapy for a total of five doses. CD8<sup>+</sup> or CD4<sup>+</sup> T cells were depleted by injection of anti-CD8 or anti-CD4 mAbs prior to the treatment. Tumor infiltration by CD8<sup>+</sup> or CD4<sup>+</sup> T cells and GM-CSF expression in CD4<sup>+</sup> T cells were analyzed by flow cytometry. ND, not detectable. Data shown are representative of three independent experiments.
