# Supplementary material for: Immunologically programming the tumor microenvironment induces the pattern recognition receptor NLRC4-dependent antitumor immunity
Source: PubMed Central journal article supplement — J Immunother Cancer. 2021 Jan 18;9(1):e001595. doi: 10.1136/jitc-2020-001595 (PMC7817794; doi:10.1136/jitc-2020-001595), 2021-01-18
Supplement: jitc-2020-001595supp006.pdf [file jitc-2020-001595supp006.pdf]

## Supplementary Figure S6

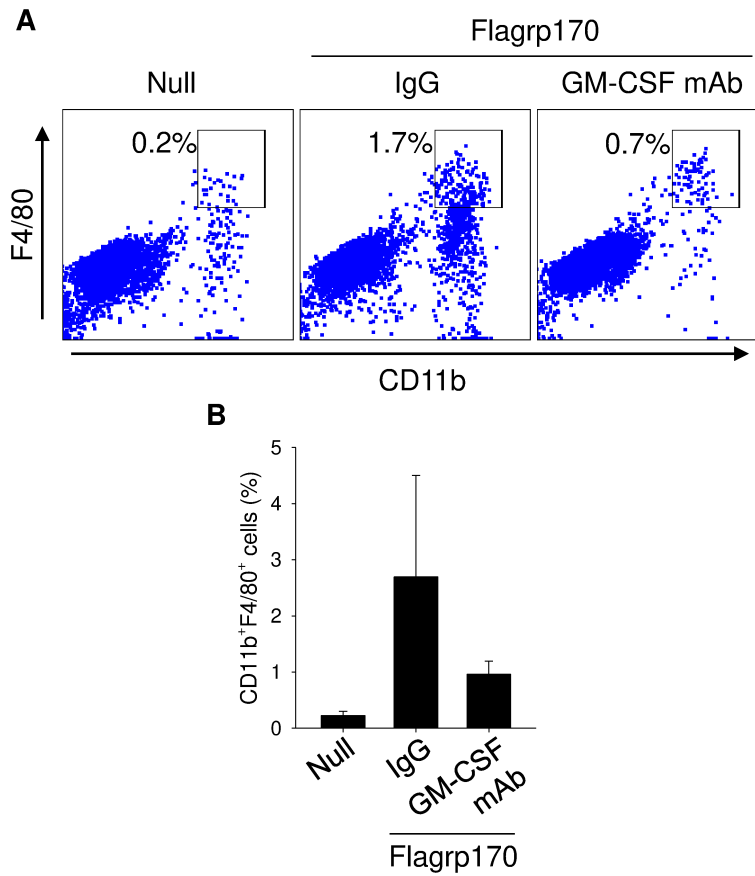

**Supplementary Figure S6. Neutralization of GM-CSF decreases Flagrp170-induced infiltration of macrophages.** B16 tumor-bearing mice (n=3) were injected with GM-CSF neutralizing antibodies during *in situ* Flagrp170 treatment. Tumor infiltration by macrophages was determined by flow cytometry. Data shown are representative of three independent experiments.
