# Supplementary material for: Immunologically programming the tumor microenvironment induces the pattern recognition receptor NLRC4-dependent antitumor immunity
Source: PubMed Central journal article supplement — J Immunother Cancer. 2021 Jan 18;9(1):e001595. doi: 10.1136/jitc-2020-001595 (PMC7817794; doi:10.1136/jitc-2020-001595), 2021-01-18
Supplement: jitc-2020-001595supp007.pdf [file jitc-2020-001595supp007.pdf]

## Supplementary Figure S7

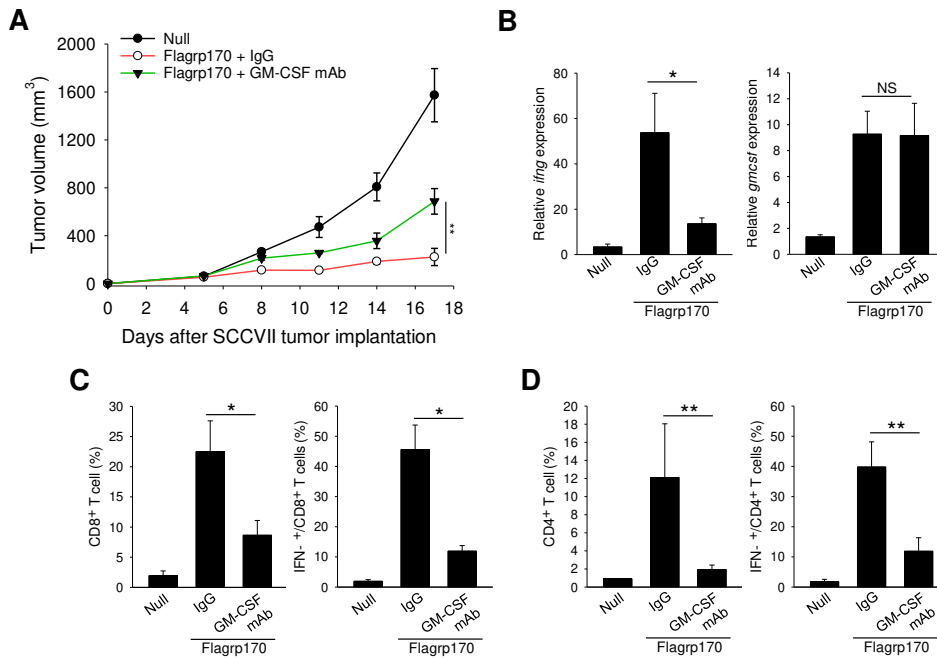

**Supplementary Figure S7. GM-CSF is involved in Flagrp170-induced antitumor immune response against SCCVII head and neck cancer.** C3H/HeN mice (n=5) bearing SCCVII tumors (4-5 mm in diameters) were treated *i.t.* with an empty adenovirus (i.e., null) or an adenovirus encoding Flagrp170 every other day for a total of five doses. GM-CSF was neutralized by injection of anti-GM-CSF antibodies. Tumor growth was followed (A). Transcription of *ifng* or *gmcsf* gene in tumor tissues was assayed by quantitative PCR (B). (C and D) Infiltration of CD8<sup>+</sup> and CD4<sup>+</sup> T cells as well as their activation status was examined by flow cytometry. Data shown are representative of three independent experiments. \*,  $p < 0.05$ , \*\*,  $p < 0.01$ , NS, not significant, using two-way repeated measures ANOVA test (A) and student t-test (B-D).
