# Supplementary material for: Immunologically programming the tumor microenvironment induces the pattern recognition receptor NLRC4-dependent antitumor immunity
Source: PubMed Central journal article supplement — J Immunother Cancer. 2021 Jan 18;9(1):e001595. doi: 10.1136/jitc-2020-001595 (PMC7817794; doi:10.1136/jitc-2020-001595), 2021-01-18
Supplement: jitc-2020-001595supp008.pdf [file jitc-2020-001595supp008.pdf]

## Supplementary Figure S8

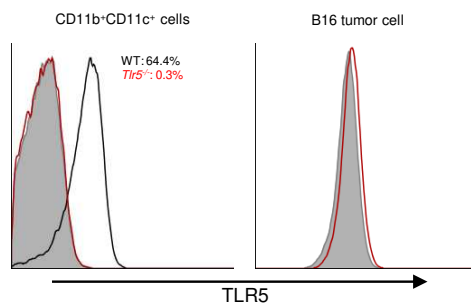

**Supplementary Figure S8. TLR5 is expressed on antigen presenting cells, not on tumor cells.** Flow cytometry was performed to examine the expression of TLR5 on splenic dendritic cells and B16 melanoma cells. Data shown are representative of three independent experiments.
