# Supplementary material for: Immunologically programming the tumor microenvironment induces the pattern recognition receptor NLRC4-dependent antitumor immunity
Source: HighWire-hosted journal article supplement (doi:10.1136/jitc-2020-001595), 2021-01-01
Supplement: jitc-2020-001595supp009_data_supplement.pdf [file jitc-2020-001595supp009_data_supplement.pdf]

## Supplementary Figure S9

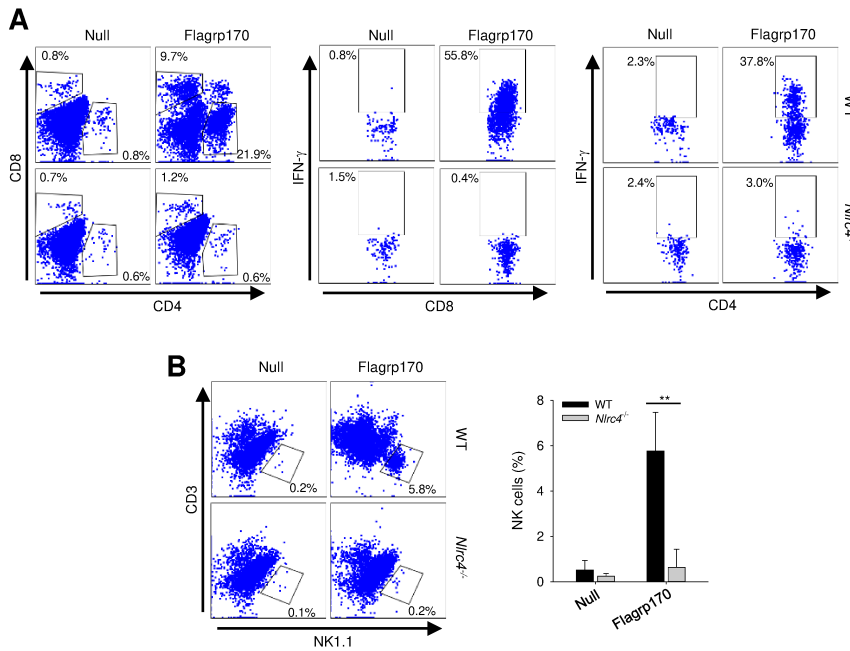

**Supplementary Figure S9. The NLRC4 inflammasome is required for immune activation following Flagrp170 therapy.** B16 tumor-bearing WT and *Nlrp4*<sup>-/-</sup> mice (n=5) were treated with an empty virus (null) or the Flagrp170-encoding virus. The frequency and activation of tumor-infiltrating T cells (A) and NK cells (B) were assayed by intracellular cytokine staining and flow cytometry. Data shown are representative of three independent experiments. \*\*,  $p < 0.01$ , using student t-test.
