# Supplementary material for: Immunologically programming the tumor microenvironment induces the pattern recognition receptor NLRC4-dependent antitumor immunity
Source: PubMed Central journal article supplement — J Immunother Cancer. 2021 Jan 18;9(1):e001595. doi: 10.1136/jitc-2020-001595 (PMC7817794; doi:10.1136/jitc-2020-001595), 2021-01-18
Supplement: jitc-2020-001595supp010.pdf [file jitc-2020-001595supp010.pdf]

**Supplementary Figure S10**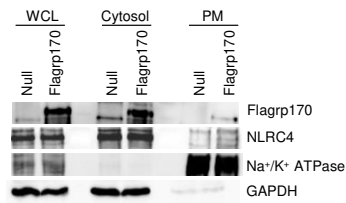**Supplementary Figure S10. Viral infection results in cytosolic expression of Flagrp170.**

Following infection of bone marrow-derived dendritic cells with the Flagrp170-encoding adenovirus, Flagrp170 expression in whole cell lysate (WCL), the Triton X-100-soluble (plasma membrane, PM), and Triton X-insoluble (cytosol) fractions was analyzed by immunoblotting. Na<sup>+</sup>/K<sup>+</sup> ATPase and GAPDH were used as markers for the membrane or cytosol fraction, respectively.
